# Supplementary material
Source: Copernicus journal article supplement (doi:10.5194/egusphere-2026-565)
Supplement: Supplementary file [file egusphere-2026-565-AC1-supplement.pdf]

**Table S3**

**Step voltages and maximum voltage settings for each particle size under different operating conditions for CS+EAC.**

| CS Temp (°C)        | 25        | 150       | 250       | 350       |           |           |           |
|---------------------|-----------|-----------|-----------|-----------|-----------|-----------|-----------|
| Dilution ratio (DR) | 4         |           | 1         | 2         | 3         | 4         |           |
| 15 nm               | 3 360 V   | 2 240 V   | 2 240 V   | 1 120 V   | 2 240 V   | 2 240 V   | 2 240 V   |
| 23 nm               | 5 600 V   | 5 600 V   | 5 600 V   | 2 240 V   | 3 360 V   | 3 360 V   | 4 480 V   |
| 30 nm               | 7 840 V   | 7 840 V   | 6 720 V   | 3 360 V   | 4 480 V   | 5 600 V   | 6 720 V   |
| 50 nm               | 19 2280 V | 19 2280 V | 19 2280 V | 5 600 V   | 8 960 V   | 14 1680 V | 19 2280 V |
| 70 nm               | 31 3720 V | 31 3720 V | 31 3720 V | 10 1200 V | 18 2160 V | 25 3000 V | 31 3720 V |
| 100 nm              | 35 4200 V | 35 4200 V | 33 3960 V | 20 2400 V | 30 3600 V | 32 3840 V | 32 3840 V |

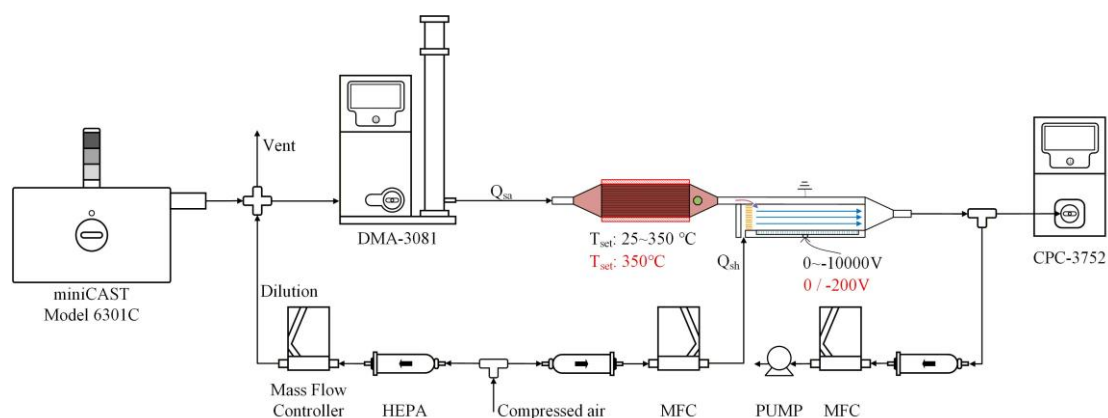

**Figure S3: Voltage-penetration efficiency curve experiment setup for CS+EAC.**

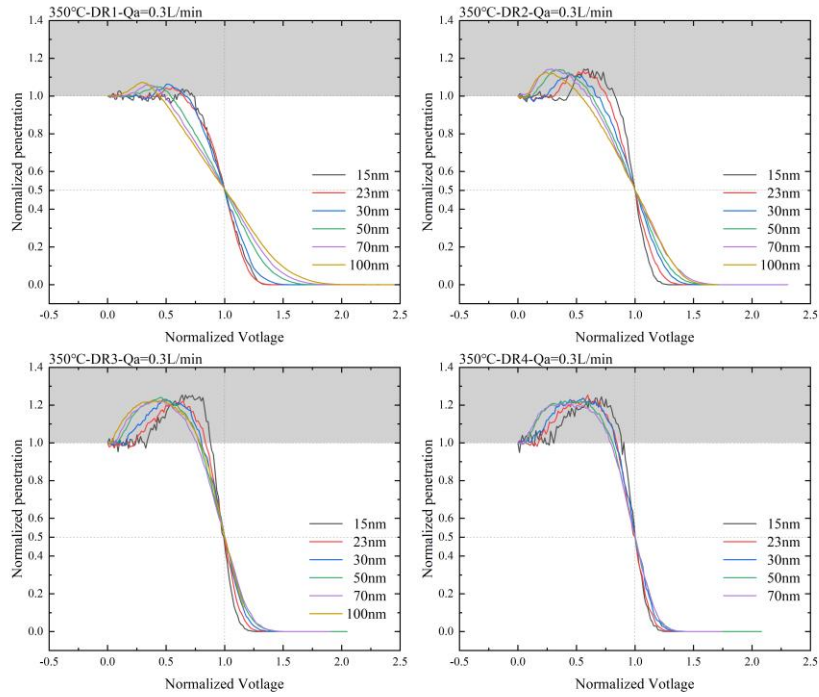

(a)

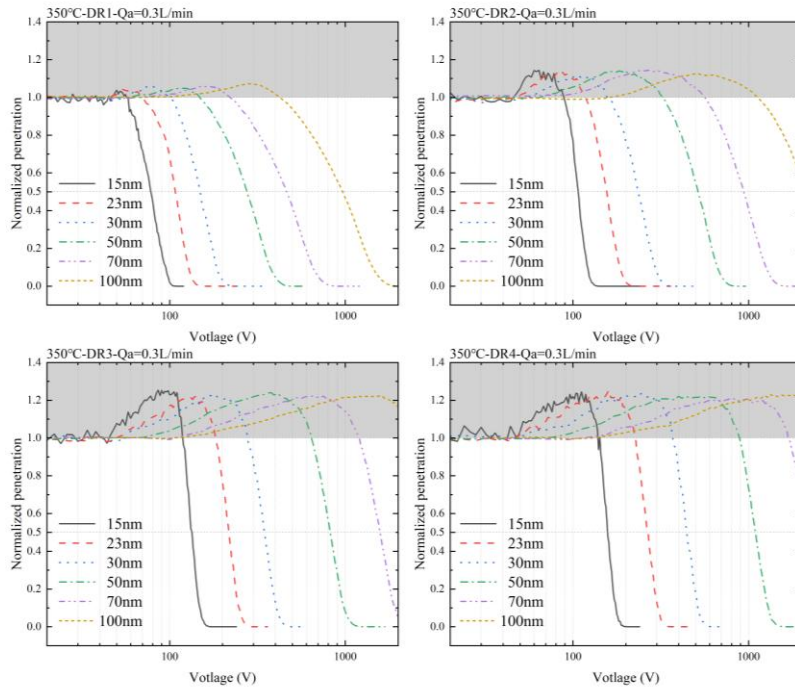

(b)

**Figure 6: Voltage-penetration efficiency curves for CS+EAC under varying DRs: (a) normalized voltage, (b) applied voltage.**

Figure S11 supplements Fig. 9b in the main text by providing a clearer illustration of the particle size distribution trend from 0 V to -300 V. It also demonstrates the improved penetration efficiency of small particles as the voltage gradually increases.

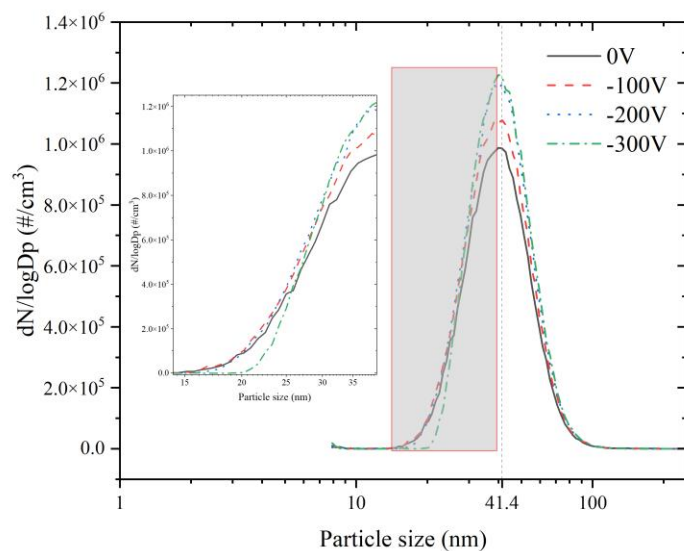

**Figure S11: Particle size distribution trends from 0 V to -300 V, with the CS+EAC set at 350 °C and DR 4.**
